# Supplementary material for: Iodine-doped sulfurized polyacrylonitrile with enhanced electrochemical performance for room-temperature sodium/potassium sulfur batteries
Source: Royal Society of Chemistry journal article supplement (doi:10.1039/c9cc01612k), 2019-01-01
Supplement: c9cc01612k1.pdf [file c9cc01612k1.pdf]

## Supporting information for

Iodine-doping sulfurized polyacrylonitrile with enhanced electrochemical  
performance for room-temperature sodium/potassium sulfur batteries

Shaobo Ma<sup>a</sup>, Pengjian Zuo<sup>a,\*</sup>, Han Zhang<sup>b</sup>, Zhenjiang Yu<sup>a</sup>, Can Cui<sup>a</sup>, Mengxue He<sup>a</sup>,  
Geping Yin<sup>a</sup>

a MITT Key Laboratory of Critical Materials Technology for New Energy  
Conversion and Storage, School of Chemistry and Chemical Engineering, Harbin  
Institute of Technology, Harbin 150001, China

b State Key Laboratory of Power Equipment & System Security and New Technology,  
Chongqing University, Chongqing 400044, China

\*Corresponding author

E-mail: [zuopj@hit.edu.cn](mailto:zuopj@hit.edu.cn)

## Experimental section

### 1.1 Preparation of the I-S@pPAN cathode

0.4 g of monomer acrylonitrile (AN, Aldrich), 1.36 g of sublimed sulfur (Aladdin) and 0.24 g iodine (Aladdin) were dispersed in 10 ml ethanol medium, followed by a balling-milling process for 8 h. After centrifuged and washed with ethanol for several times, the mixture was dried at 70 °C in a vacuum oven for 24 h. Then the mixture was sealed in a quartz tube filled with argon gas and heated at 300 °C for 10 h. After cooling down, the obtained product denoted as I-S@pPAN was disposed with grinding and sieving (200 mesh). For S@pPAN synthesis by the similar procedure, the mass of monomer acrylonitrile and sublimed sulfur were 0.4 g and 1.6 g, respectively.

### 1.2 Alkali metal-sulfur batteries assembly and electrochemical measurements

The electrochemical performance of the samples was evaluated with CR-2025 type coin cells assembled in an argon-filled glove box. The positive electrodes were fabricated by mixing active materials, Super P and polyvinylidene fluoride (PVDF) in a weight ratio of 8:1:1. After stirring about 12 h, the homogeneous slurry was casted onto the carbon-coated aluminum foil and dried at 70 °C under vacuum overnight. The electrode film was punched into round disks with a diameter of 14 mm, and the area loading of I-S@pPAN in the electrode was around 1.0 mg cm<sup>-2</sup>. The electrolyte/sulfur ratio is around 380 μL/mg. For the measurement of RT-Na/S and RT-K/S batteries, the kinds of electrolyte were 1 M sodium perchlorate (NaClO<sub>4</sub>) + ethylene carbonate/ dimethyl carbonate (EC:DEC, volume ratio=1:1) + 8% fluoroethylene carbonate (FEC), 0.8 M potassium hexafluorophosphate (KPF<sub>6</sub>) + EC/DEC (volume ratio=1:1), respectively. The Whatman glass fibres were used as separators for RT-Na/S battery (GF/D 1823) and RT-K/S battery (GF/A 1820). The galvanostatic measurement was performed at Neware Battery Testing System at 28 °C. Electrochemical impedance spectroscopy (EIS) measurements were performed on a PARSTAT 2273 workstation in the frequency range between 10<sup>-2</sup> and 10<sup>5</sup> Hz with an amplitude of 10 mV. Cyclic voltammetry (CV) curves were recorded on an AUTOLABPGSTAT302N electrochemical workstation at a scanning rate of 0.1 mV

s<sup>-1</sup>. The direct current (DC) polarization measurement was carried out to evaluate the electronic conductivity of materials using symmetric cells with the configurations of stainless-steel disk/Au/I-S@pPAN (or S@pPAN)/Au/stainless-steel disk. The prepared powder was pressed into pellet with a diameter of 13 mm, and the gold spraying on pellet was conducted to improve the interfacial contact between stainless-steel disk and pellet. The four-probe measurement was carried out on KEITHLEY 2450 to further explore the electronic conductivity of the prepared materials. As the electrical resistivity of pure S@pPAN (or I-S@pPAN) was out of the test range of KEITHLEY 2450, the S@pPAN (or I-S@pPAN):Super P pellets with a ratio of 8:1 were measured to evaluate the conductivity of the whole positive electrode. The equilibrium potentials of the batteries were obtained by the galvanostatic intermittent titration (GITT) technique, which consists of a series of current pluses at 0.1C for 20 min, followed by a 2 h relaxation. The sodium ion coefficient ( $D_{Na^+}$ ) was calculated by the equation 1:

$$D_{Na^+} = \frac{4}{\pi\tau} \left( \frac{m_B V_M}{M_B A} \right)^2 \left( \frac{\Delta E_s}{\Delta E_t} \right)^2 \quad (1)$$

Here, the  $\tau$ ,  $m_B$ ,  $V_M$ ,  $M_B$ ,  $A$  were duration of the current pulse (s), the mass, the molar volume (cm<sup>3</sup> mol<sup>-1</sup>), molecular weight (g mol<sup>-1</sup>) and the electrode/electrolyte contacting area (cm<sup>2</sup>), respectively.  $\Delta E_s$  was the steady-state voltage change and  $\Delta E_t$  was the voltage change during the constant current pulse.

### 1.3 Material characterization

The morphology and elemental mapping of the as-prepared materials were investigated by field-emission scanning electron microscopy (FESEM, FEI Helios Nanolab 600i). The sulfur elemental contents of the materials were determined by means of elemental analyzer based on TurboFlash<sup>TM</sup> Combustion Technology (CHNS, EA 3000, Elementar). The X-ray diffraction (XRD) patterns were collected by a Netherlands' PANalytical X'pert power diffractometer with Cu K $\alpha$  radiation ( $\lambda=1.54$  Å). The Raman spectra were obtained using a Horiba Jobin Yvon Labram-HR800 micro-Raman system with a 532 nm YAG laser excitation. X-ray photoelectron spectroscopy (XPS) measurements were carried out with a Thermo Fisher Scientific

ESCALAB 250XI spectrometer using a monochromic Al K $\alpha$  source (1486.6 eV). Fourier transform infrared spectra were taken using a Bruker Vertex 70 FTIR spectrometer.

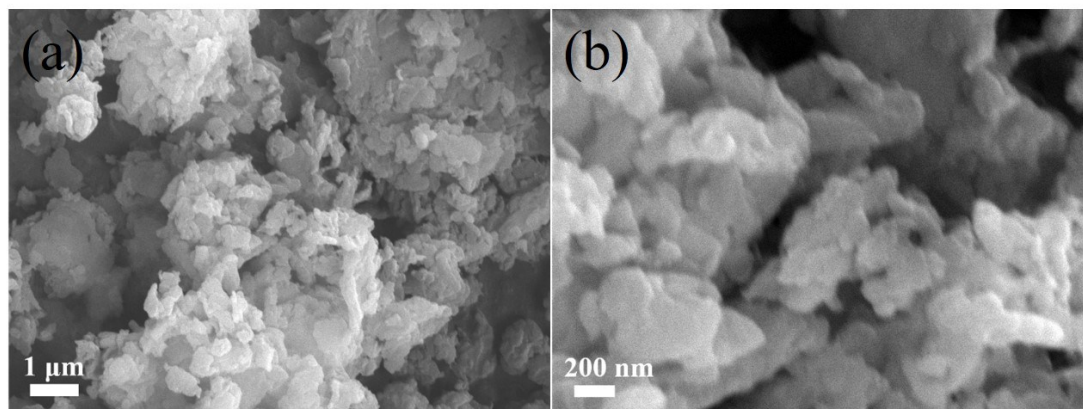

**Figure S1.** The SEM images of I-S@pPAN with different magnification, scale bars: 1  $\mu\text{m}$  (a); 200 nm (b).

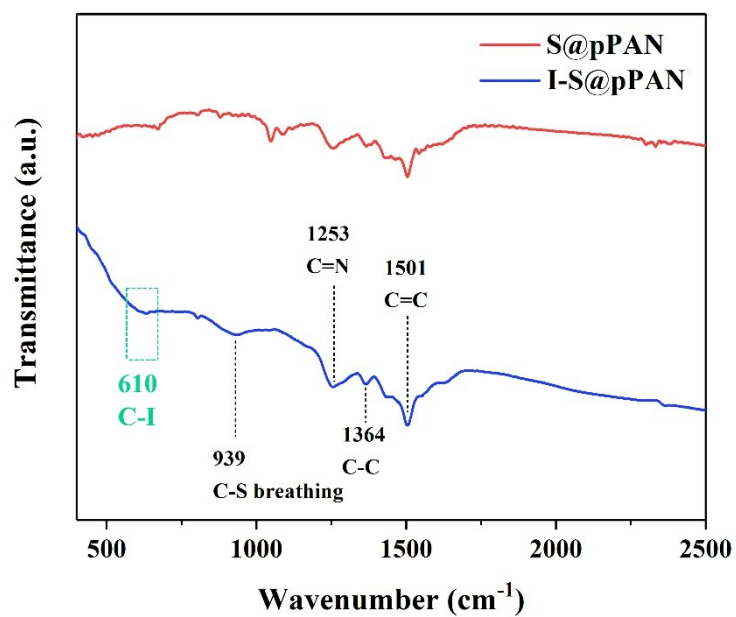

**Figure S2.** FT-IR spectra of S@pPAN and I-S@pPAN.

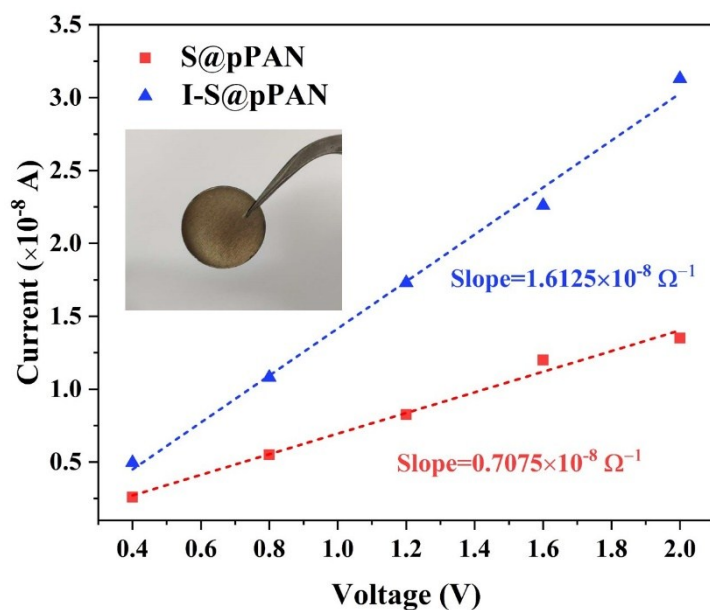

**Figure S3.** Equilibrium currents of the S@pPAN and I-S@pPAN at various voltages using DC polarization method.

**Table S1.** Electric conductivity of S@pPAN and I-S@pPAN measured by DC polarization method and calculated according to the following equation ( $\sigma_e = (I \cdot L) / (U \cdot S)$ ).

| Sample   | Resistance<br>( $\times 10^{-8} \Omega$ ) | Thickness of pellet<br>(L, cm) | Area of pellet<br>(S, $\text{cm}^2$ ) | Electric conductivity<br>( $\sigma_e$ , $\text{S cm}^{-1}$ ) |
|----------|-------------------------------------------|--------------------------------|---------------------------------------|--------------------------------------------------------------|
| S@pPAN   | 1.413                                     | 0.0575                         | 1.326                                 | $3.07 \times 10^{-10}$                                       |
| I-S@pPAN | 0.617                                     | 0.0485                         | 1.326                                 | $5.90 \times 10^{-10}$                                       |

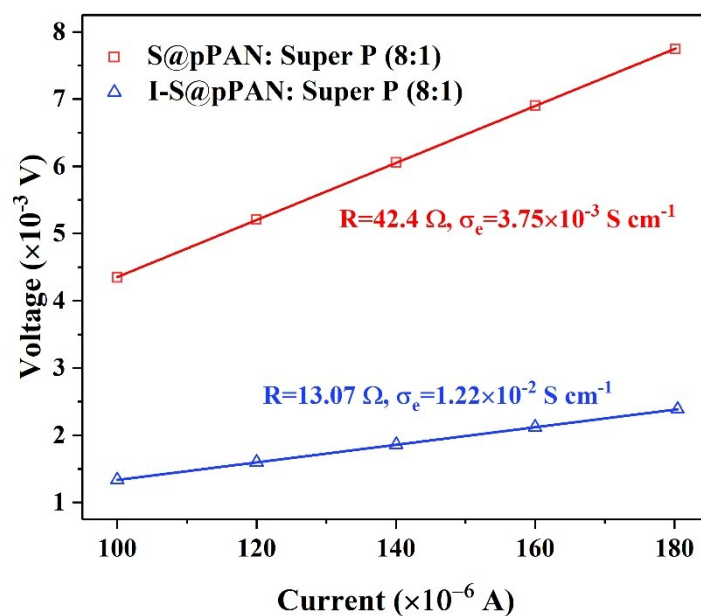

**Figure S4.** Equilibrium voltages of the S@pPAN (or I-S@pPAN): Super P (8: 1) composites at various currents using four-probe method.

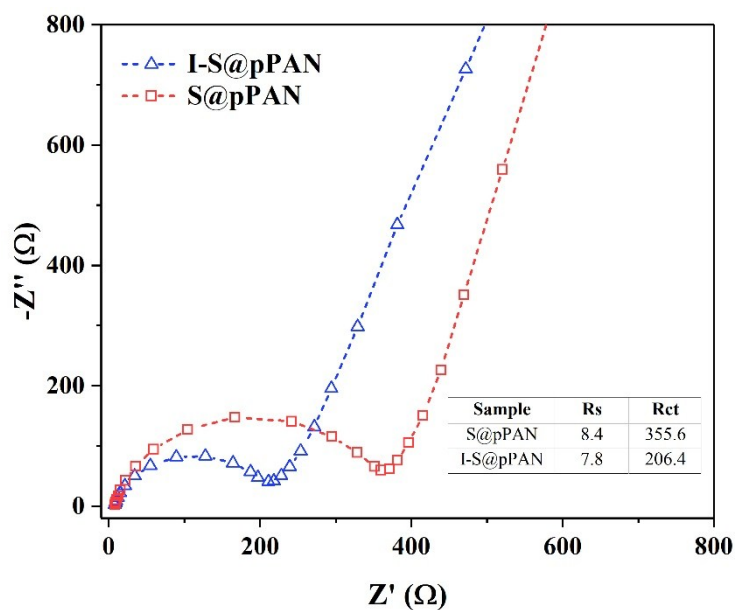

**Figure S5.** Nyquist plots of the cells with S@pPAN and I-S@pPAN cathodes.

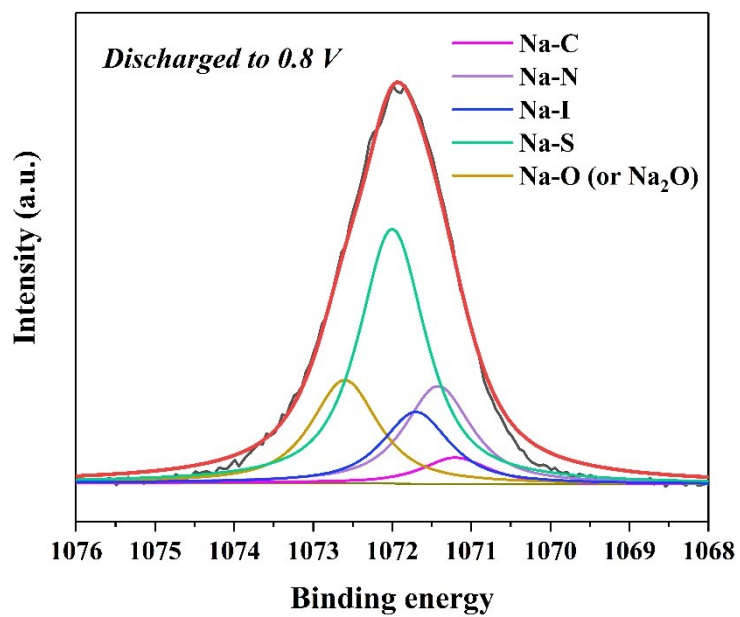

Figure S6. High-resolution Na 1s spectra of I-S@pPAN at initial fully discharged stage.

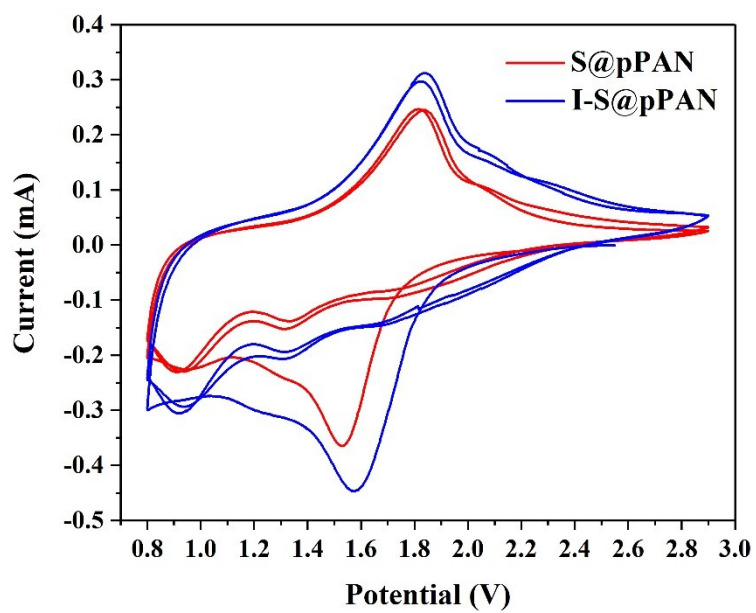

Figure S7. CV curves of S@pPAN and I-S@pPAN in RT-K/S battery.

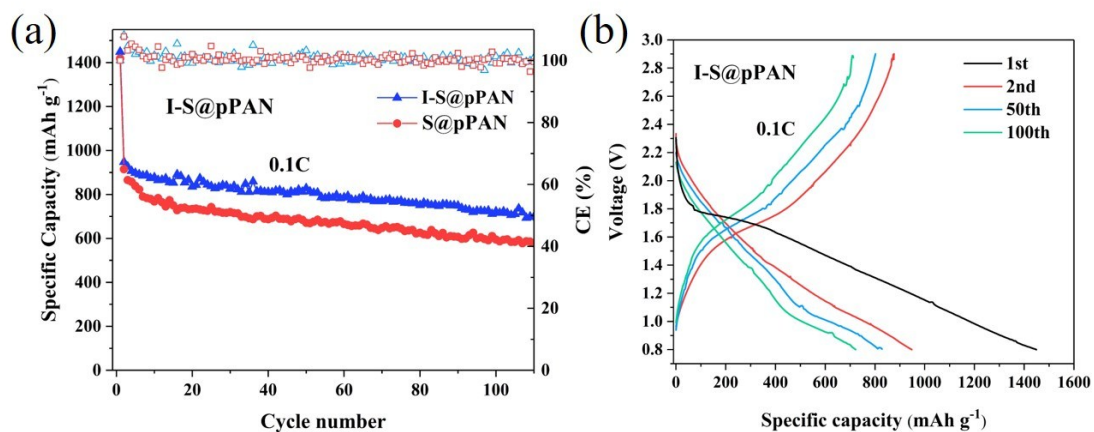

**Figure S8.** (a) Cycling performance of different cathodes for RT-K/S battery at 0.1C for 110 cycles, (b) The corresponding discharge/charge curves for RT-K/S battery of I-S@pPAN at 0.1C.

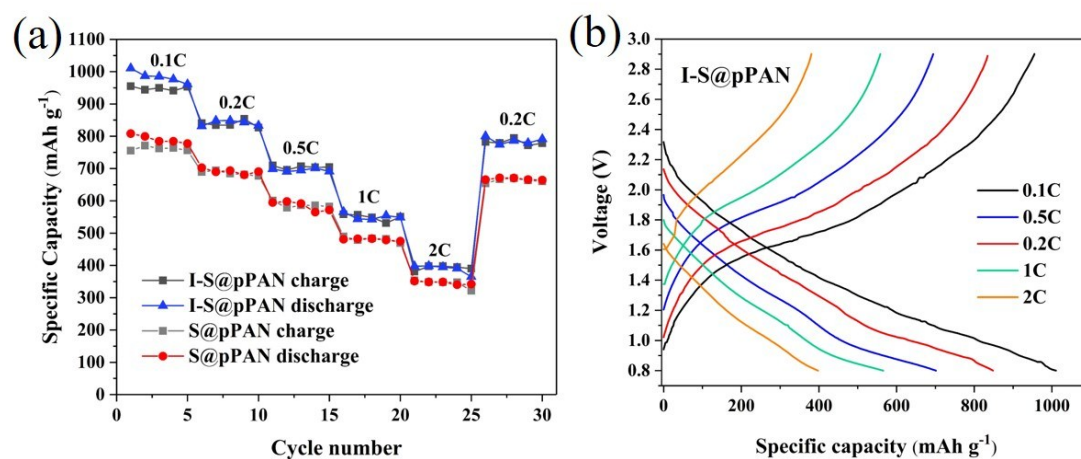

**Figure S9.** (a) Rate performance of cathodes for RT-K/S battery with rates ranging from 0.1C to 2C, (b) Representative voltage profiles of the I-S@pPAN cathode at various C rate.

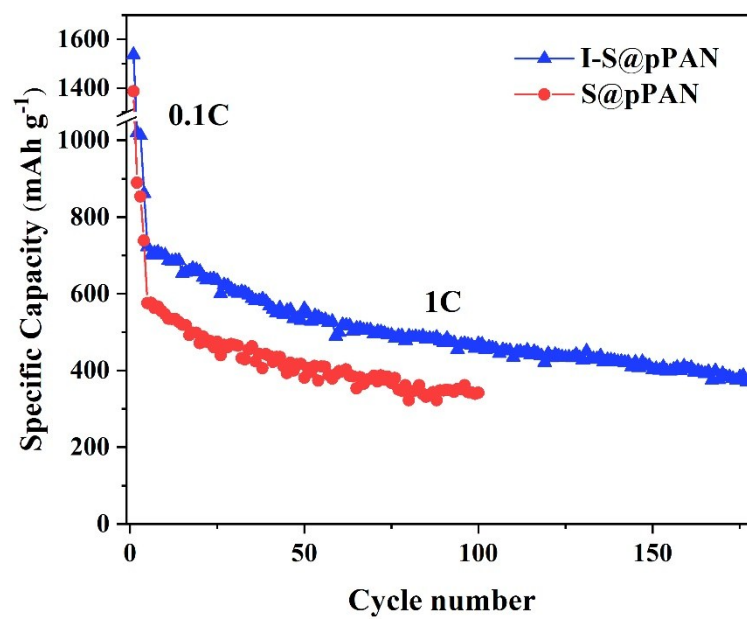

**Figure S10.** Long-term cycling stability of electrodes for RT-K/S battery at 1C over 500 cycles.
